# Supplementary material for: Removing unwanted variation in a differential methylation analysis of Illumina HumanMethylation450 array data
Source: PubMed Central journal article supplement (PMC4652745; doi:10.1093/nar/gkv526), 2015-05-18
Supplement: supp_gkv526_nar-00167-met-n-2015-File010.pdf [file supp_gkv526_nar-00167-met-n-2015-File010.pdf]

## Supplementary Methods: RUV-inverse

Assume there are  $m$  arrays and  $n$  CpGs. Let  $Y$  be an  $m \times n$  matrix such that  $Y_{ij}$  is the  $M$ -value for the  $j^{\text{th}}$  CpG on the  $i^{\text{th}}$  array. We model  $Y$  as

$$Y_{m \times n} = X_{m \times p} \beta_{p \times n} + W_{m \times k} \alpha_{k \times n} + \epsilon_{m \times n} \quad (1)$$

where  $X$  is a matrix of biological factors of interest and  $W$  is a matrix of unknown, unwanted factors. Optionally, we may also wish to include an additional  $Z\gamma$  term in the model, where  $Z$  is a matrix of known covariates; see [?] for details. We assume that  $\text{Rank}[(X \mid W)] = p + k < m$ .

We assume that  $X$ ,  $W$ , and  $\beta$  are fixed. We assume that  $\alpha$  and  $\epsilon$  are random. The stochastic assumptions on  $\alpha$  and  $\epsilon$  are:

$$\epsilon_{ij} \sim N(0, \sigma_j^2) \quad (2)$$

$$\alpha_{ij} \sim N(0, 1) \quad (3)$$

$$\alpha \perp \epsilon \quad (4)$$

$$\epsilon_{ij} \perp \epsilon_{i'j'} \text{ if } (i, j) \neq (i', j') \quad (5)$$

$$\alpha_{ij} \perp \alpha_{i'j'} \text{ if } (i, j) \neq (i', j') \quad (6)$$

Note in particular that the variance of  $\epsilon_{ij}$  is allowed to differ for every CpG.

Let  $n_c$  denote the number of negative controls. Let  $Y_c$  denote the  $m \times n_c$  submatrix of  $Y$  containing only the columns of the negative controls. Define  $\beta_c$ ,  $\alpha_c$ , and  $\epsilon_c$  similarly. Assume that  $\beta_c = 0$ ; this is the ‘‘negative control’’ assumption. It follows that

$$Y_c = W\alpha_c + \epsilon_c. \quad (7)$$

Define

$$G \equiv \frac{1}{n_c} Y_c Y_c'$$

and note that

$$\mathbb{E}[G] = WW' + \bar{\sigma}_c^2 I$$

where

$$\bar{\sigma}_c^2 \equiv \frac{1}{n_c} \sum_{j_c} \sigma_{j_c}^2.$$

Here  $j_c$  is an index variable that ranges over the indices of all of the negative controls. In words,  $\bar{\sigma}_c^2$  is the average variance of the error terms of the negative controls.

Let  $Y_j$  denote the  $j^{\text{th}}$  column of  $Y$  and note that

$$\text{Var}[Y_j] = WW' + \sigma_j^2 I.$$

In practice, we do not expect expect the  $\sigma_j^2$  to vary too greatly from CpG to CpG, and we therefore assume that for all  $j$ ,  $\sigma_j^2$  is approximately equal to  $\bar{\sigma}_c^2$ , at least roughly. We may therefore consider  $G$  to be a rough approximation of  $\text{Var}[Y_j]$ . See [?] for a more detailed discussion of this point.

We may now define the RUV-inverse estimator for  $\beta$ . We define  $\hat{\beta}$  as

$$\hat{\beta} \equiv [X'G^{-1}X]^{-1} X'G^{-1}Y. \quad (8)$$

We observe that this is essentially a feasible generalized least squares (FGLS) estimator.

We calculate the standard errors using the inverse method, as described in [X]. We briefly summarize the method here. The basic idea is to re-write (??) as

$$Y = X^* \beta^* + X\beta + W\alpha + \epsilon \quad (9)$$

where  $X^*$  is an  $m \times 1$  matrix whose entries have been independently randomly generated following a standard normal distribution, and where  $\beta^*$  is  $1 \times n$  matrix whose entries are all 0. We then fit the model, and calculate  $\hat{\beta}^*$ .

The variance of  $\hat{\beta}_j^*$  (conditional on  $X^*$ ) can be well-approximated by a known, linear function of  $\sigma_j^2$ . By inverting this function,  $\sigma_j^2$  can be estimated as a function of  $\hat{\beta}_j^*$ . (This inversion is where the inverse method gets its name.) The estimate of  $\sigma_j^2$  obtained in this way will be very noisy, because it is obtained using only one degree of freedom. However, by generating many different  $X^*$ , repeating the process many times, and averaging the resulting estimates of  $\sigma_j^2$ , we obtain a much less noisy final estimate of  $\sigma_j^2$ . Once we have this estimate of  $\sigma_j^2$ , we may then use it to calculate the variance of  $\hat{\beta}_j$  (conditional on  $X$ ), and thus the standard errors.

It is possible to work through this process analytically, so that it is actually not necessary to generate random  $X^*$  and fit the resulting models. Again, see [?] for the details. Here we simply state the result, which can be expressed as a four-step procedure:

- (1) Regress  $Y_c$  on  $X$ . Let  $R$  denote the residuals, i.e.  $R \equiv Y_c - X(X'X)^{-1}X'Y_c$ .
- (2) Let  $UDU'$  be the eigendecomposition of  $RR'$ . Let  $d_i$  be the  $i^{\text{th}}$  diagonal entry of  $D$ .
- (3) Let  $E_{m \times m}$  be a diagonal matrix with diagonal entries

$$e_i \equiv \begin{cases} \int_0^\infty \frac{dt}{d_i^2 (1 + 2t/d_i^2) \prod_s^{m-p} \sqrt{1 + 2t/d_s^2}} & \text{if } 1 \leq i \leq m - p \\ 0 & \text{if } m - p < i \leq m \end{cases}$$

- (4) Let  $\hat{\sigma}_j^2 \equiv Y_j' U E U' Y_j$

## References

- [1] Gagnon-Bartsch, J.A., Jacob, L. and Speed, T.P. (2013) *Removing Unwanted Variation from High Dimensional Data with Negative Controls*. Tech. Rep. 820, Department of Statistics, University of California, Berkeley (2013).
